# Supplementary material for: Acquired resistance to BRAF inhibition induces epithelial-to-mesenchymal transition in BRAF (V600E) mutant thyroid cancer by c-Met-mediated AKT activation
Source: PubMed Central journal article supplement (PMC5352181; doi:10.18632/oncotarget.13480), 2016-11-21
Supplement: oncotarget-08-596-s001.pdf [file oncotarget-08-596-s001.pdf]

## Acquired resistance to BRAF inhibition induces epithelial-to-mesenchymal transition in BRAF (V600E) mutant thyroid cancer by c-Met-mediated AKT activation

### Supplementary Materials

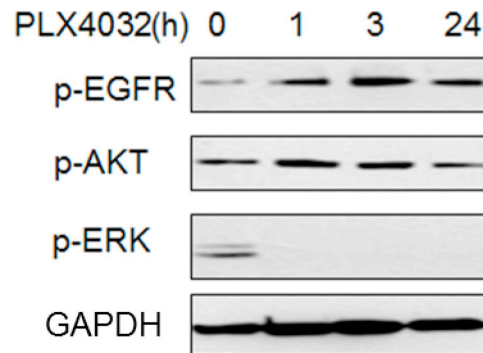

**Supplementary Figure S1:** Western blot analysis after treatment of 1  $\mu$ M PLX4032 until 24 hours in 8505C cells. p-EGFR expression was increased following BRAF inhibition.

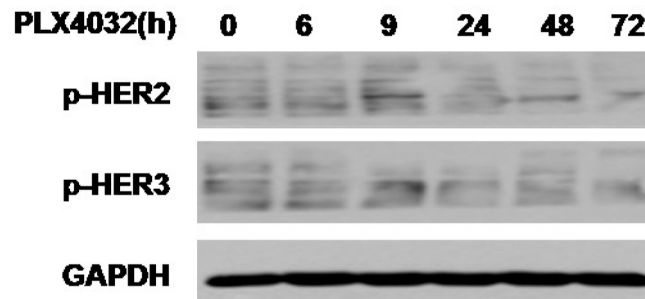

**Supplementary Figure S2:** Western blot analysis after treatment of 1  $\mu$ M PLX4032 until 72 hours in 8505C cells. There were no significant changes in p-HER2 or p-HER3 following BRAF inhibition.

**Supplementary Table S1: Microarray data set of 8505C and BCPAP cells**

| Gene   | Fold change |
|--------|-------------|
| MET    | 1.6         |
| PIK3CA | -1.2        |
| BRAF   | -1.1        |
| CRAF   | 1.1         |
| ERK    | -1.3        |

The expression of each gene is expressed in fold change values of 8505C with reference to BCPAP.

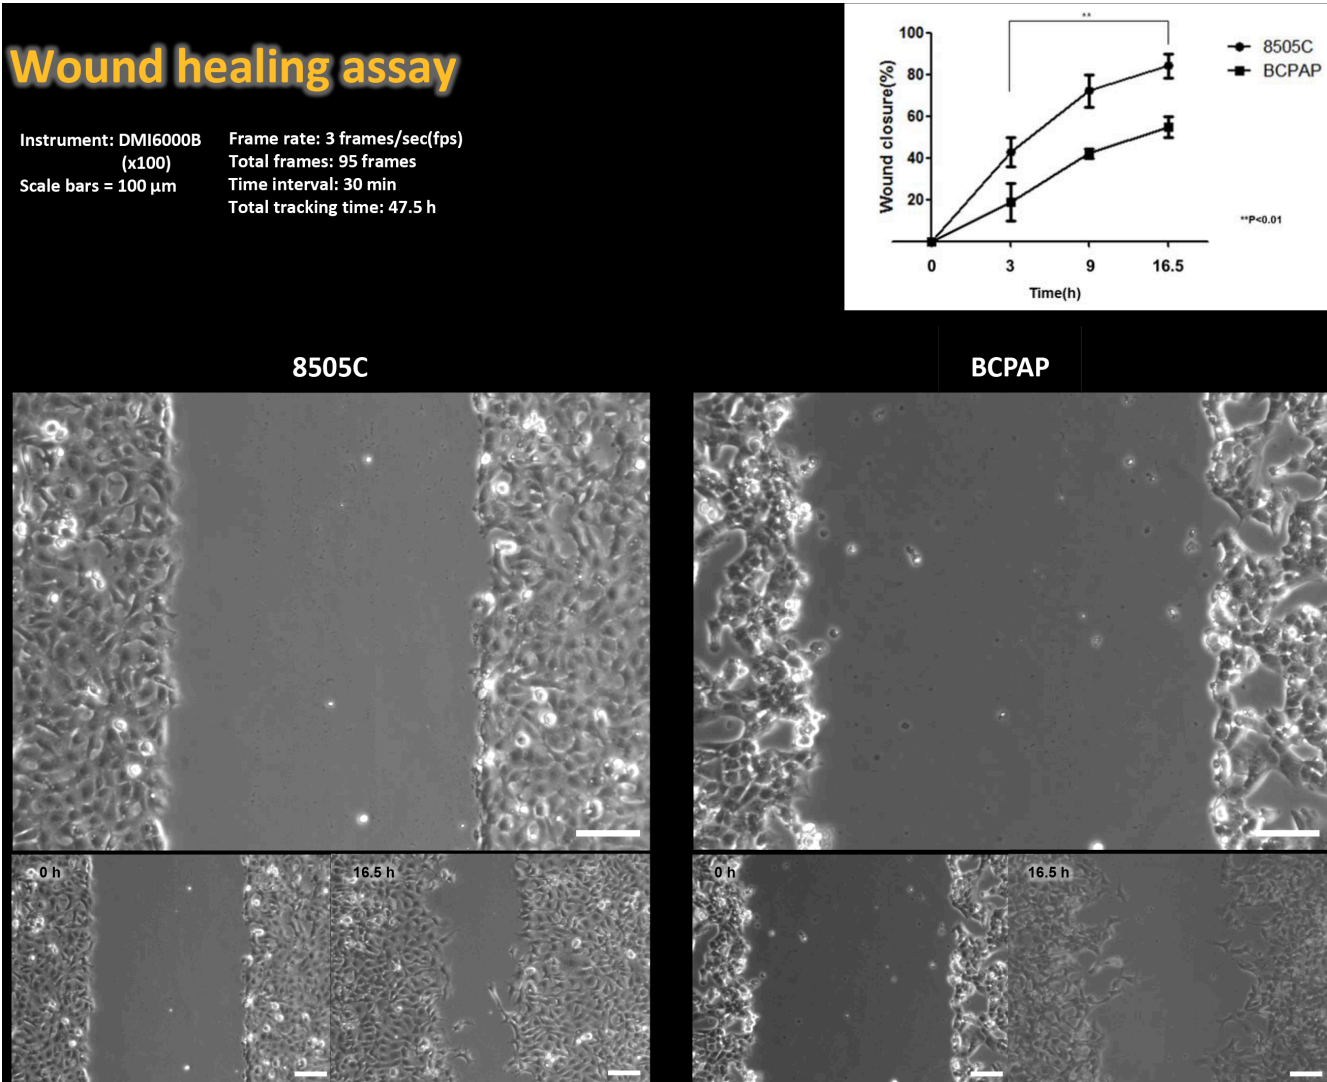

**Supplementary Video S1: Live wound healing assay of 8505C and BCPAP after treatment with 1 μM PLX4032 for 9 h. \*\*p < 0.01.**
